# Supplementary material for: Efficient dye removal using well-crystallized layered double hydroxides and their oxides: insights into kinetics, thermodynamics, isotherm and the memory effect
Source: Royal Society of Chemistry journal article supplement (doi:10.1039/d5ra06650f), 2025-01-01
Supplement: d5ra06650f1.pdf [file d5ra06650f1.pdf]

Supporting Information for:

**Efficient Dye Removal Using Well-Crystallized Layered Double Hydroxides and  
Oxides: Insights into Kinetics, Thermodynamics, Isotherm and Memory Effect**

Saleem Reihana Parveen<sup>a</sup> and Viruthachalam Thiagarajan\*

<sup>a</sup>School of Chemistry, Bharathidasan University, Trichy – 620024, Tamil Nadu, India.

E-mail: [v.thiagarajan@bdu.ac.in](mailto:v.thiagarajan@bdu.ac.in)

## **Table of Contents**

**Scheme S1.** Schematic representation of two-dimensional structure of LDH

**Figure S1.** Absorption spectra of MO dye before and after adsorption at different time intervals

**Table S1.** d-spacing values after adsorption of MO dye on MAH and MAO and LDO few days after calcination.

**Figure S2.** XPS deconvoluted spectra of different metal atoms for MAH and MAO

**Figure S3.** Percentage adsorption of various cationic and anionic dyes for MAH and MAO at different time intervals at 200 mg/L of adsorbate

**Figure S4.** Percentage adsorption of anionic dyes for MAH and MAO at different time intervals at 500 mg/L of adsorbate

**Figure S5.** Percentage adsorption of MO dye by MAH and MAO at varying dye concentrations

**Figure S6:** Linear plot of Freundlich adsorption isotherm (a) MAH and (b) MAO

**Figure S7:** The normalized UV-vis spectrum of pure ethanol dye in MO and desorbed MO dye removed using ethanol

**Table S2.** Comparison of different adsorbents with MO dye

**Figure S8.** Zeta potential analysis of nanocomposites before and after adsorption of MO dye

**Figure S9.** SEM image of nanocomposites after adsorption of MO dye

**Figure S10.** EDX mapping of nanocomposites before and after adsorption of MO dye

**Figure S11.** BET isotherm data of nanocomposites after adsorption of MO dye

**Table S3.** Textural properties of the material after adsorption

**Figure S12.** XRD patterns of MAO recorded immediately and 30 days after calcination

**Figure S13.** Percentage adsorption of MO dye by MAO measured over different days from the calcination day

## Materials and Methods

The powder X-ray diffraction (XRD) was studied with X'pert powder XRD system with Co K $\alpha$  radiation in the 2 $\theta$  range of 0-150° having high speed solid-state X'celerator detector. The Fourier Transform – Infrared (FT-IR) analysis for the adsorbent was performed using Jasco FT/IR-4700 by ATR method in 400 – 4000 cm<sup>-1</sup> wavenumber regions. The thermal gravimetric analysis (TGA) was carried out using STA300 of thermogravimetric analyzer under inert atmosphere having temperature range of 25°-1500°C with a heating rate of 10°C/min. The morphology of the material before dye adsorption was studied using Field Emission Scanning Electron Microscopy (FESEM) using JEOL, JSM-7800F with magnification ranging from 100 X to 300,000 X. The elemental composition of the materials was studied using Thermo scientific XPS system with Al-K $\alpha$  (1486.8 eV) micro-focused monochromator with variable spot size (50-400  $\mu$ M) at Ar<sup>+</sup> energy range 100-400 eV. The specific surface area of the materials before dye adsorption was measured using Autosorb iQ Quantachrome instruments by Brunauer-Emmett-Teller (BET) analysis using N<sub>2</sub> adsorption-desorption isotherm techniques at adsorption temperature 77K. The absorbance of dyes before and after adsorption was measured using Shimadzu UV-1900i UV-vis spectrophotometer. Remi RSB 12 water bath shaker was used to attain equilibrium during the adsorption process. Standard deviations for all experiments were calculated from two independent measurements. Zeta potential measurements were carried out using a Horiba SZ-100Z DLS instrument. SEM images and EDX mapping of the nanocomposites after MO dye adsorption were obtained using a TESCAN VEGA 3 instrument. BET analysis of the nanocomposites after MO dye adsorption was performed using N<sub>2</sub> adsorption-desorption isotherm measurements at 77 K with an Anton Paar-Autosorb iQ-XR-AG instrument.

**The percentage adsorption and adsorption capacity formula:**

$$\text{Percentage adsorption} = \frac{(C_0 - C_e) * 100}{C_0}$$

$$\text{Adsorption Capacity} \left( \frac{\text{mg}}{\text{g}} \right) = (C_0 - C_e) \frac{V}{W * 1000}$$

where,

$C_0$  = Initial dye concentration (mg/l)

$C_e$  = Equilibrium dye concentration (mg/l)

$V$  = Volume of adsorbate (L)

$W$  = Weight of the adsorbent (g)

### **Adsorption Kinetic Equations**

The linearized format of the pseudo-second order rate equation,

$$\frac{t}{q_t} = \frac{1}{k_2 q_e^2} + \frac{t}{q_e} \text{ ----- SEQ1}$$

where,

$q_e$  and  $q_t$  = Amount of MO adsorbed at equilibrium time and at specified time

$k_2$  = Pseudo-second-order rate constant

### **Adsorption thermodynamics**

Different parameters such as enthalpy  $\Delta H$ , entropy  $\Delta S$ , and Gibbs free energy  $\Delta G$

which can be calculated by using the following equations,

$$\Delta G = -RT \ln K \text{ ----- SEQ2}$$

$$\ln K = \frac{\Delta S}{R} - \frac{\Delta H}{RT} \text{ ----- SEQ3}$$

where,

K = Adsorption distribution coefficient ( $q_e/C_e$ )

R = Universal gas constant (8.314 J/mol/K)

T = Temperature in kelvin

## Linear and non-linear forms of Freundlich and Langmuir Adsorption isotherms

### Freundlich Adsorption isotherm:

Linear form of Freundlich isotherm model,

$$\ln q_e = \ln k_f + \frac{1}{n} \ln C_e \text{ ----- SEQ4}$$

And the non-linear form is,

$$q_e = k_f C_e^{1/n} \text{ ----- SEQ5}$$

where,

$q_e$  is the adsorption capacity at equilibrium

1/n is the heterogeneity factor

$k_f$  is the Freundlich constant

### Langmuir Adsorption isotherm:

The linear form of Langmuir isotherm model is given by,

$$\frac{C_e}{q_e} = \frac{C_e}{q_m} + \frac{1}{K_l q_m} \text{ ----- SEQ6}$$

The non-linear form is,

$$q_e = \frac{q_m k_l C_e}{1 + k_l C_e} \text{ ----- SEQ7}$$

Where,

$q_m$  is the maximum adsorption capacity

$k_l$  is the Langmuir constant

$C_e$  is the equilibrium concentration of the dye

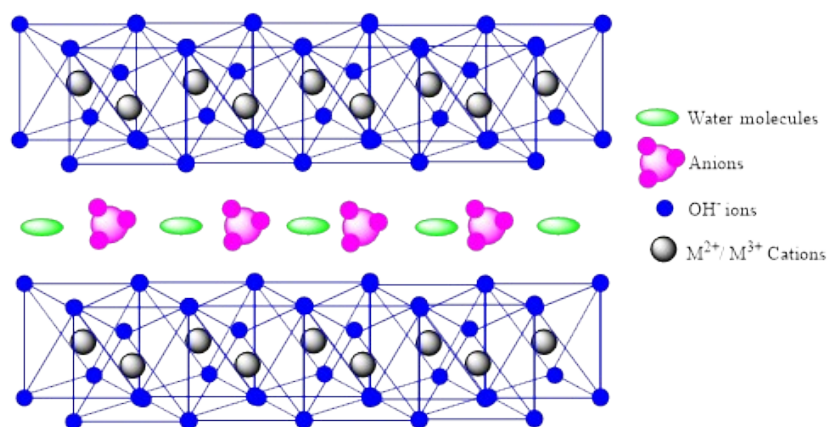

**Scheme S1.** Schematic representation of two-dimensional structure of LDH

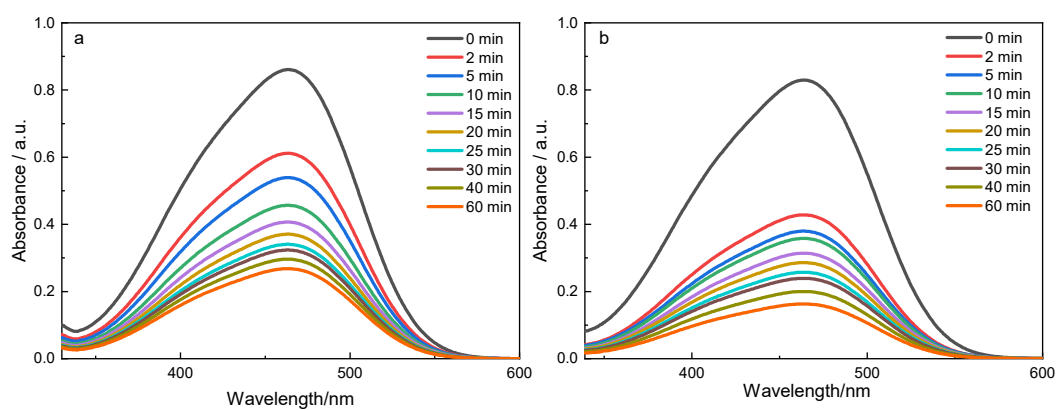

**Figure S1.** Absorption spectra of MO dye before and after adsorption at various time intervals using (a) MAH and (b) MAO. Experimental conditions: initial dye concentration = 200 mg/L, adsorbent dose = 30 mg, temperature = 30 °C. Different dilution factors were applied to prevent absorbance saturation; these were accounted for in the calculations of both percentage adsorption and adsorption capacity.

| hkl plane | LDH<br>d Spacing (Å°) |                     | LDO<br>d Spacing (Å°) | LDO few days<br>after<br>calcination<br>d Spacing (Å°) |
|-----------|-----------------------|---------------------|-----------------------|--------------------------------------------------------|
|           | Before<br>Adsorption  | After<br>Adsorption | After<br>Adsorption   |                                                        |
| (003)     | 7.4508                | 7.47106             | 7.708938              | 7.531495                                               |
| (006)     | 3.744363              | 3.75233             | 3.828701              | 3.780932                                               |
| (012)     | 2.548594              | 2.554552            | 2.571374              | 2.549535                                               |
| (015)     | 2.264857              | 2.268375            | 2.28567               | 2.321936                                               |
| (018)     | 1.919258              | 1.922213            | 1.941592              | 2.085441                                               |
| (110)     | 1.514552              | 1.516571            | 1.520318              | 1.51973                                                |
| (113)     | 1.485366              | 1.486912            | 1.491574              | 1.478123                                               |

**Table S1.** d-spacing values after adsorption of MO dye on MAH and MAO and LDO few days after calcination.



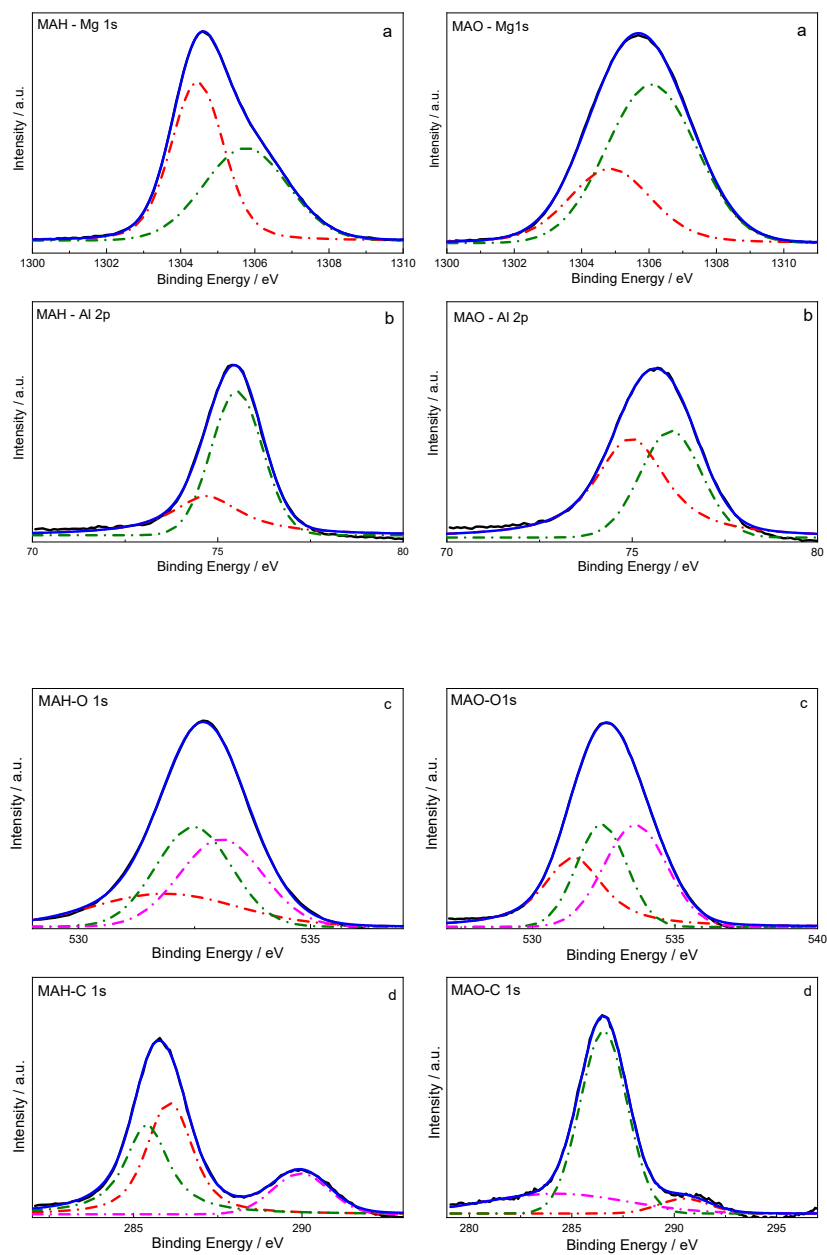

**Figure S2.** XPS deconvoluted spectra of (a) Oxygen 1s, (b) Carbon 1s, (c) Magnesium 1s and (d) Aluminum 2p Spectra

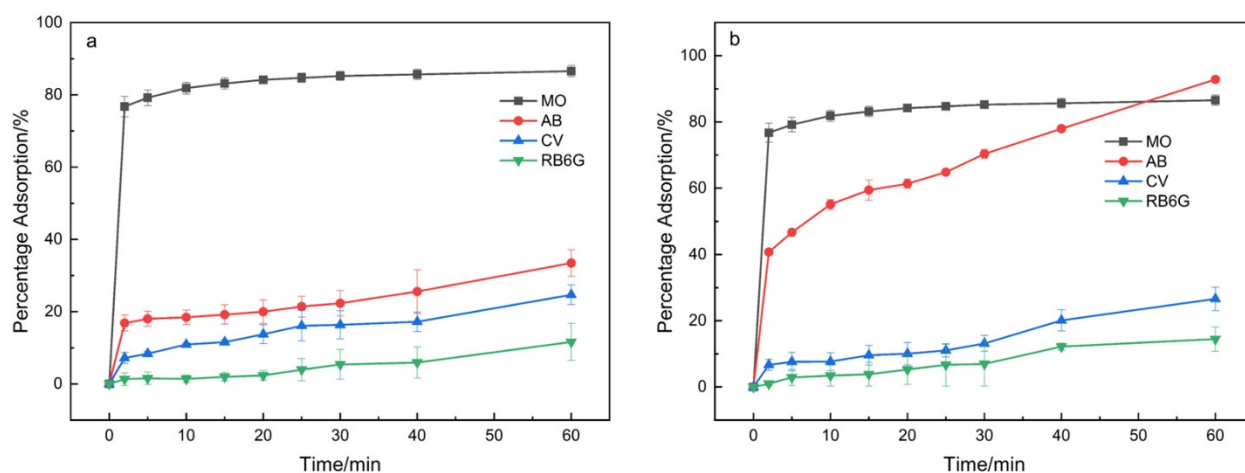

**Figure S3.** Percentage adsorption of various cationic and anionic dyes over different time intervals using (a) MAH and (b) MAO. Experimental conditions: dye concentration = 200 mg/L, adsorbent dose = 30 mg, temperature = 30 °C.

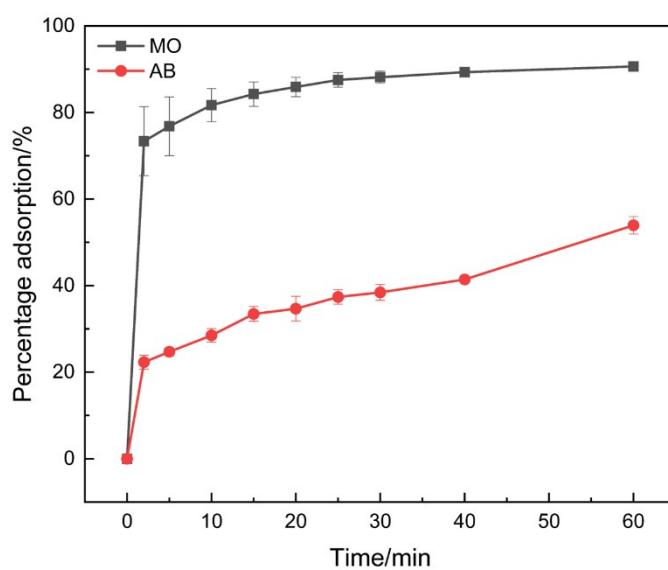

**Figure S4.** Percentage adsorption of anionic dyes at different time intervals using MAO. Experimental conditions: dye concentration = 500 mg/L, adsorbent dose = 30 mg, temperature = 30 °C.

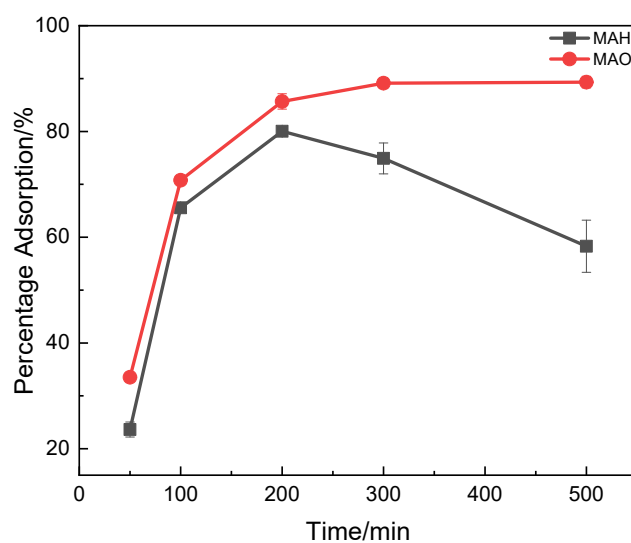

**Figure S5.** Percentage adsorption of MO dye by MAH and MAO at varying dye concentrations (50, 100, 200, 300, and 400 mg/L). Experimental conditions: adsorbent dose = 30 mg, contact time = 1 hour, temperature = 30 °C.

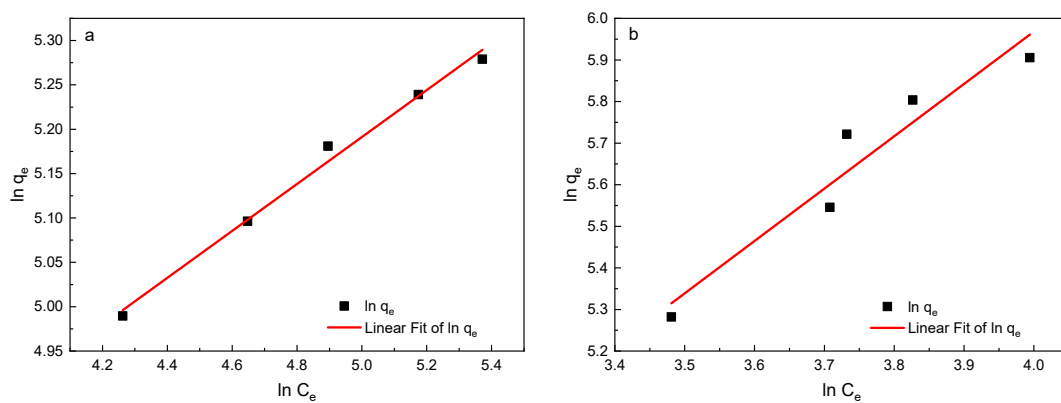

**Figure S6.** Freundlich adsorption isotherm linear plots of (a) MAH and (b) MAO

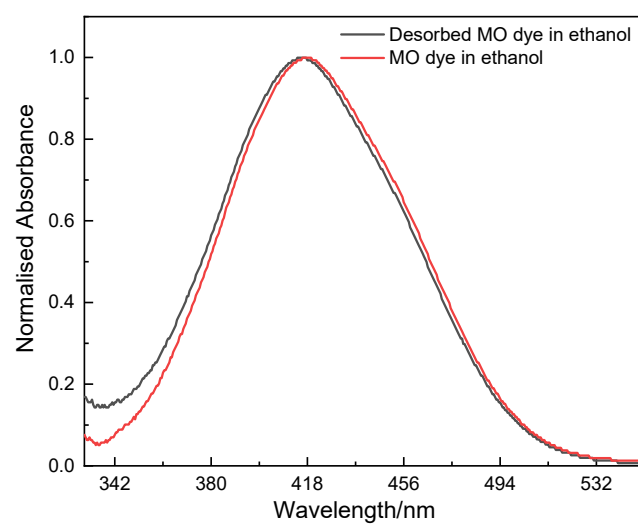

**Figure S7.** The normalized absorption spectrum of pure MO dye in ethanol and MO dye desorbed from MAO nanocomposite using ethanol

| Adsorbent                                         | qe /<br>mg/g | Conditions                                                                                                                                                                                                                    | Contact<br>time     | Reusability       | Reference        |
|---------------------------------------------------|--------------|-------------------------------------------------------------------------------------------------------------------------------------------------------------------------------------------------------------------------------|---------------------|-------------------|------------------|
| Ni Mg Al LDO                                      | 322.58       | MO – 25 mg/L<br>Dose – 0.01 g<br>Temp. - 25°C<br><b>Higher adsorption capacity at pH - 10</b>                                                                                                                                 | 80 min              | 3 cycles          | (1)              |
| Fe <sub>3</sub> O <sub>4</sub> @ SiO <sub>2</sub> | 182.50       | MO – 100 mg/L<br>Dose – 0.02 g<br>Temp. - 45°C<br><b>Higher adsorption capacity at pH - 2</b>                                                                                                                                 | 30 min              | 5 cycles          | (2)              |
| Nitrate intercalated Mg Al LDH                    | 583          | MO – 0.03 mg/ml<br>Dose – 0.2 mg/ml<br><b>Higher adsorption only at 40 - 50°C</b><br><b>Higher adsorption capacity at pH - 5</b>                                                                                              | 15 min<br>(40-50°C) | 5 cycles          | (3)              |
| Zn (II) Metal organic gel                         | 100          | MO – 25 mg/L<br>Dose – 5 mg<br><b>Higher adsorption only at 15°C</b><br><b>Higher adsorption capacity at pH 4-10</b>                                                                                                          | 10 min              | 3 cycles          | (4)              |
| Triptycene-based hyper-crosslinked porous polymer | 220.82       | MO – 500 mg/L<br>Dose – 50 mg<br>Temp. – 25°C<br><b>Higher adsorption capacity at pH 7</b>                                                                                                                                    | 60 min              | 5 cycles          | (5)              |
| MAH                                               | 265          | MO – 500 mg/L<br>Dose – 30 mg<br>Temp. – 30°C<br><b>Higher adsorption capacity in the range of pH 3-10</b><br><b>Independent of pH</b><br>After 5 <sup>th</sup> cycle, acid wash restored the adsorption capacity nearly 100% | 60 min              | 6 cycles<br>(MAO) | <b>This work</b> |
| MAO                                               | 324          |                                                                                                                                                                                                                               | 10 min              |                   |                  |

**Table S2.** Comparison of different adsorbents with MO dye

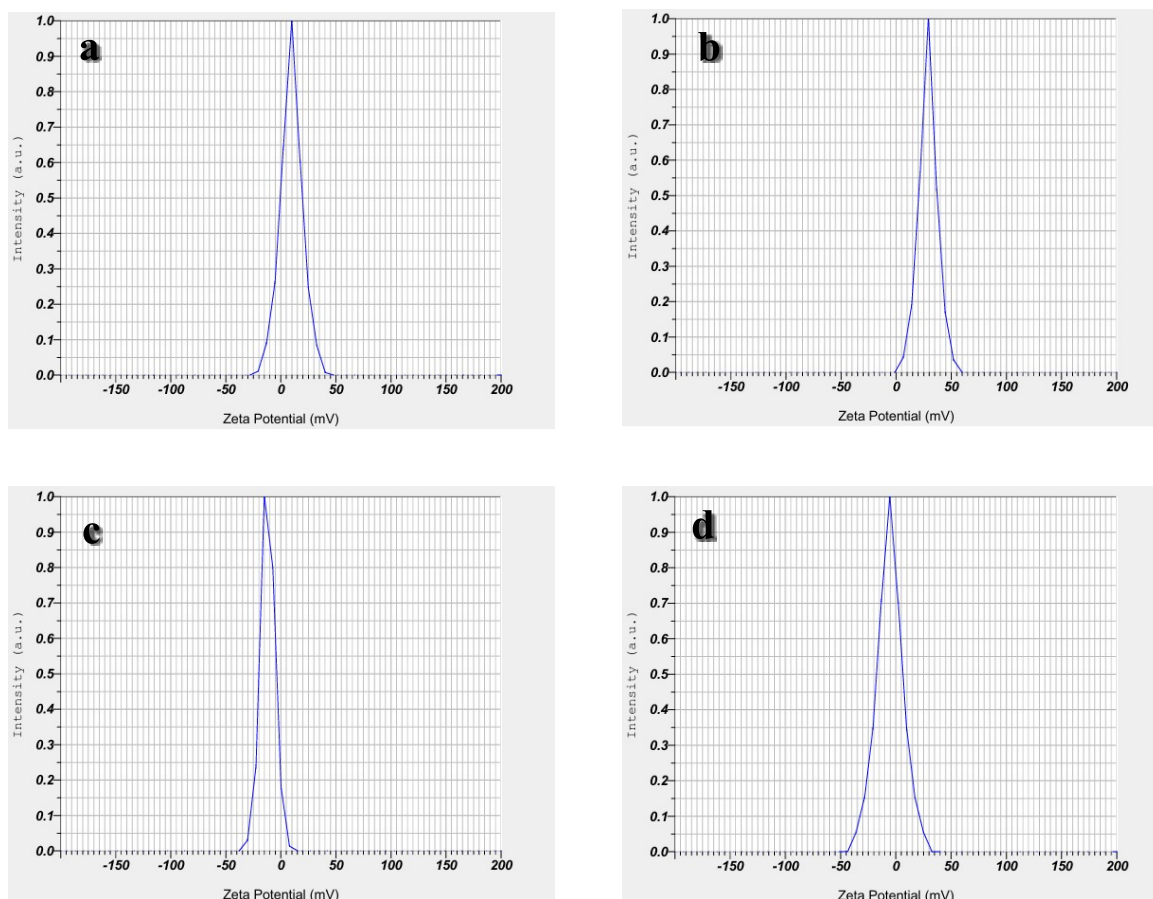

**Figure S8.** Zeta potential analysis of nanocomposites before and after adsorption of MO dye.

(a) MAH, (b) MAO, (c) MO-MAH and (d) MO-MAO.

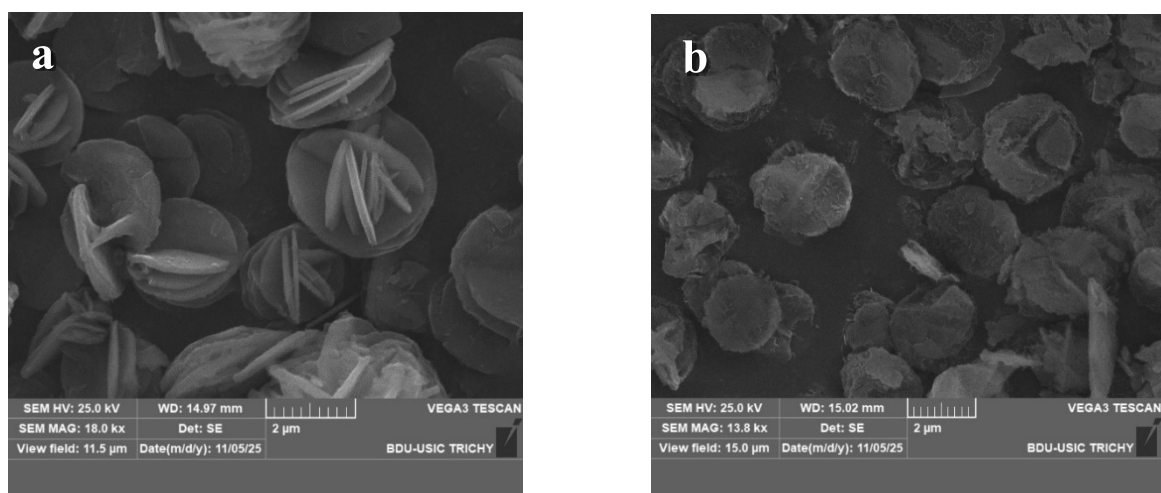

**Figure S9.** SEM images of nanocomposites after adsorption of MO dye. (a) MAH and (b)

MAO.

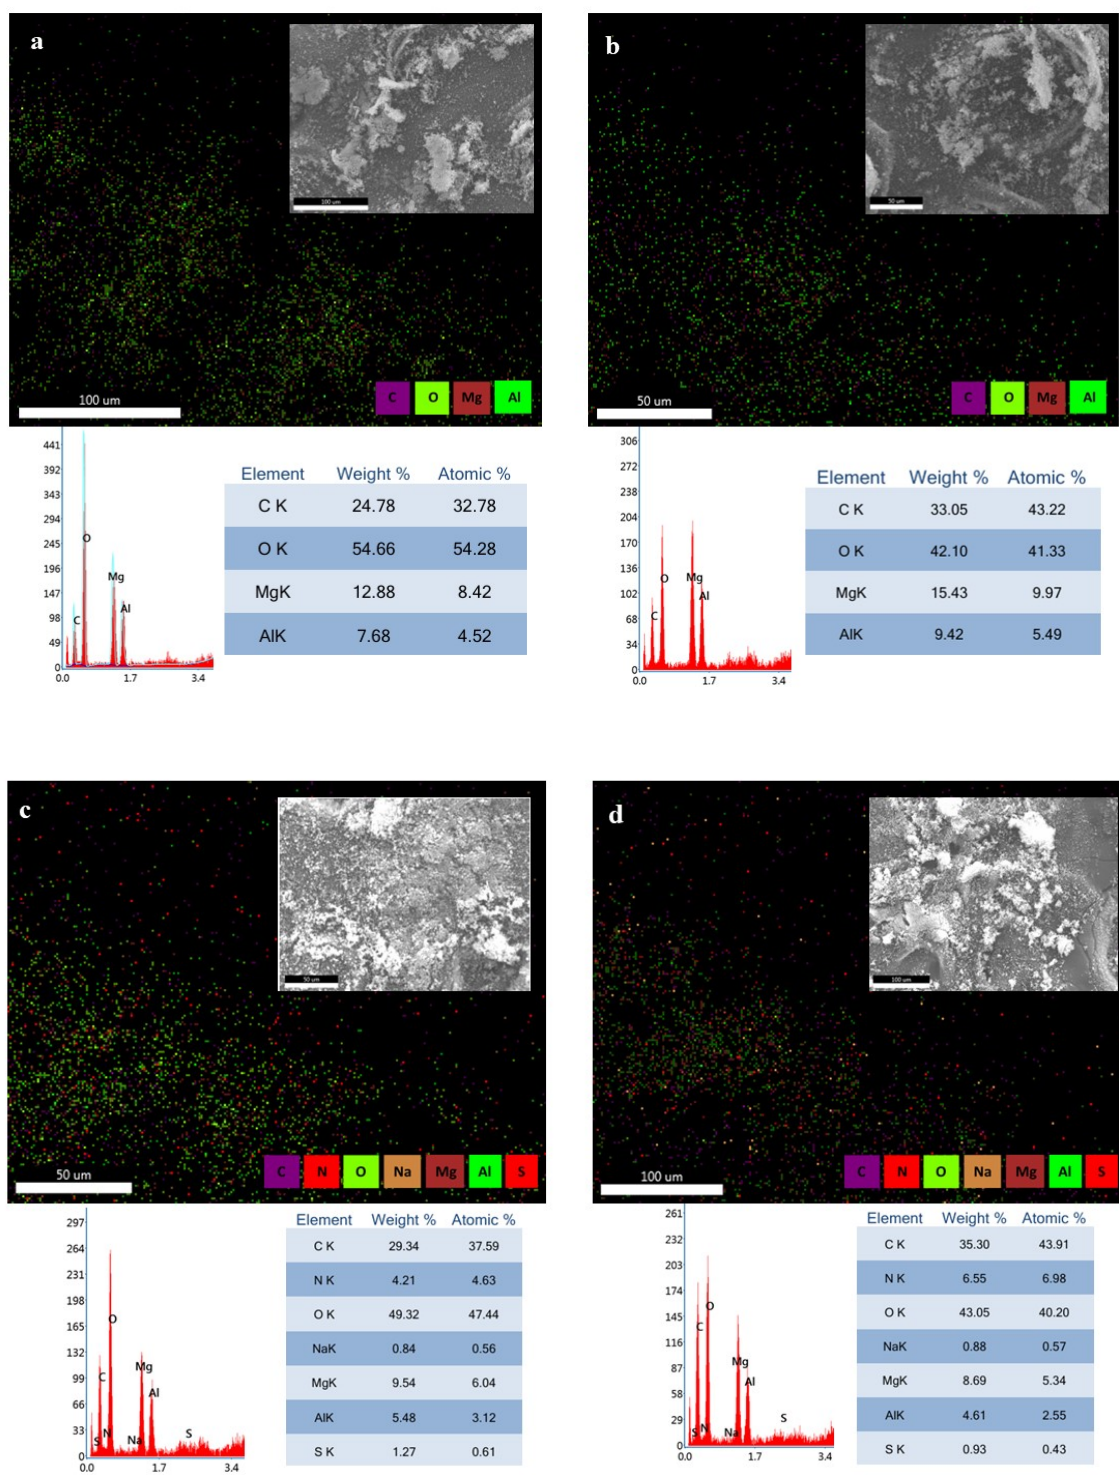

**Figure S10.** EDX mapping of nanocomposites before and after adsorption of MO dye

(a) MAH and (b) MAO (c) MO-MAH and MO-MAO

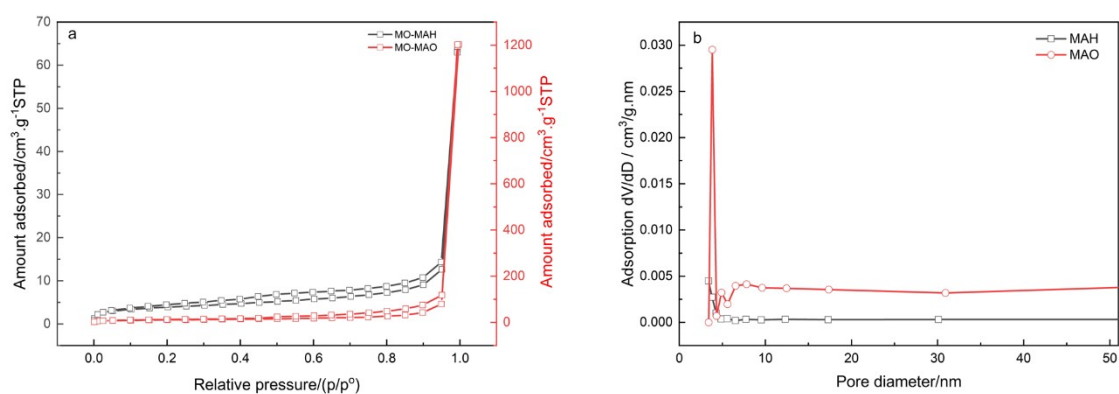

**Figure S11.** (a) N<sub>2</sub> Adsorption -desorption isotherm and (b) pore size distribution curve of MAH and MAO after MO dye adsorption

| Adsorbent | BET Surface Area<br>(m <sup>2</sup> /g) | Average Pore Diameter<br>(nm) |
|-----------|-----------------------------------------|-------------------------------|
| MO-MAH    | 13.844                                  | 3.4                           |
| MO-MAO    | 38.180                                  | 3.827                         |

**Table S3.** Textural properties of the material after adsorption



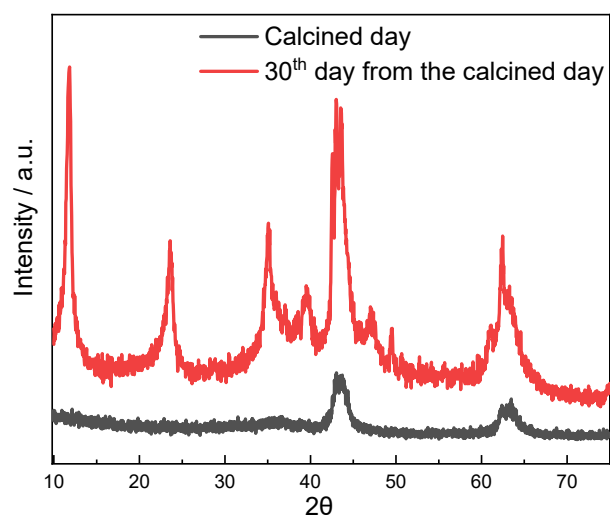

**Figure S12.** XRD patterns of MAO recorded immediately and 30 days after calcination.

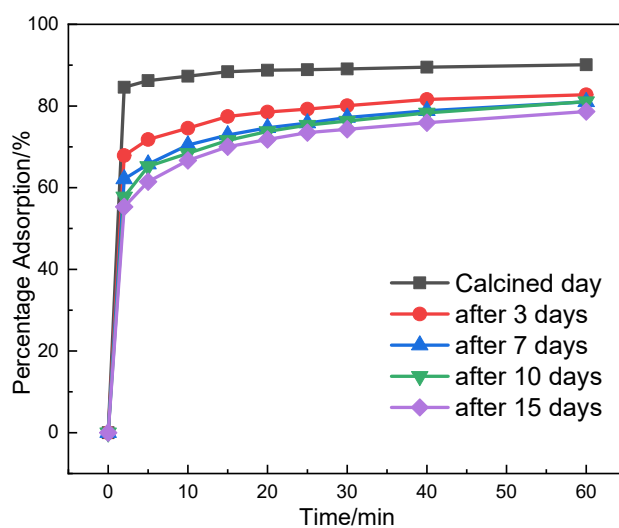

**Figure S13.** Percentage adsorption of MO dye by MAO measured over different days from the calcination day (Day 1 to Day 15). Experimental conditions: dye concentration = 200 mg/L, adsorbent dose = 30 mg, contact time = 1 hour, temperature = 30 °C.

## References

1. T. Waheed, S. U. Din, L. Ming, P. Ahmad, P. Min, S. Haq and I. U. Din, *Nanomaterials*, **2023**, *13*, 1943.
2. H. Li, H. Jin, R. Li, J. Hua, Z. Zhang and R. Li, *Sci. Rep.*, **2024**, *14*, 1217.
3. B. S. Yadav and S. Dasgupta, *Inorg. Chem. Commun.*, **2022**, *137*, 109203.
4. M. Wang, S. Day, Z. Wu, X. Wan, X. Ye and B. Cheng, *Colloids Surf., A*, **2021**, *628*, 127335.
5. Y. He, W. Bao, Y. Hua, Z. Guo, X. Fu, B. Na and H. Liu, *RSC Adv.*, **2022**, *12*, 5587–5594.
